# Supplementary material for: Effect of Electronic Screening With Personalized Feedback on Adolescent Health Risk Behaviors in a Primary Care Setting: A Randomized Clinical Trial
Source: PubMed Central journal article supplement (PMC6512281; doi:10.1001/jamanetworkopen.2019.3581), 2019-05-10
Supplement: jamanetwopen-2-e193581-s001.pdf [file jamanetwopen-2-e193581-s001.pdf]

# Check Yourself Study Protocol

## I. Purpose and Background

### a. **Specific scientific objective(s) of research**

*Aim 1: To examine the impact of a web-based, electronic Personalized Motivational Feedback tool (ePMF) on adolescent-perceived care during the well visit assessed 1-day post-visit.* We will examine the impact of the web-based Check Yourself tool on youth-reported receipt of PCP delivered risk-reduction counseling. As an exploratory analysis, we will also explore the impact of Check Yourself on healthcare satisfaction. These effects will be tested against a usual care condition.

*Aim 2: To examine the efficacy of the web-based Check Yourself tool in reducing adolescent health risk behaviors following the primary care visit.* We will examine change in risk behavior score from baseline to 3 months post-visit in the Check Yourself group compared to usual care. Behaviors to be included in the score are alcohol use, drug use, risky sexual activity, depression, physical activity, sugar sweetened beverage consumption, fruit and vegetable consumption, and seatbelt and helmet use. As a secondary analysis, we will explore changes in rates of each of these individual variables for Check Yourself versus usual care from baseline to 3 months.

### b. **Background (purpose, lay language)**

Adolescents have some of the highest rates of risk behaviors of all age groups and health behaviors developed in adolescence can persist into adulthood. Health risk behaviors, such as alcohol and other drug use, smoking, unsafe sexual activity, and poor nutrition and physical inactivity are among the most common causes of adolescent illness and premature death. These behaviors carry significant risks for subsequent disease, disability, and healthcare burden. Despite these risks, health risk screening in primary care is infrequently performed and results are rarely followed by targeted intervention.

Adolescents list primary care providers (PCPs) among the first people with whom they would consider discussing risk behaviors, and report greater satisfaction with care when PCPs discuss these sensitive topics with them. Thus, primary care visits present a key opportunity for improving the health of adolescents. However, to take advantage of this opportunity, health systems strategies are needed that can practically be implemented in the time-pressured environment of primary care.

Studies have shown that electronic health risk screening is feasible and efficient in clinical practice, increases adolescents' comfort with disclosure of behavior and encourages utilization of preventive health services. Based on this evidence, electronic multi-risk behavior screening tools are being developed for adolescent care settings. However, to reduce risk behaviors, screening needs to be linked to interventions. In response to the need for screening-linked interventions, our study team has developed a web-based, electronic Personalized Motivational Feedback tool (ePMF) which we refer to as the "Check Yourself tool" for the purposes of participant recruitment, enrollment, and participation. Based on motivational interviewing, a technique to mobilize personal change, Check Yourself is designed to promote healthy choices for the multiple behaviors relevant to adolescents.

The Check Yourself tool uses adolescent health screen responses, treatment guidelines, and national data on health risk behaviors to: 1) provide direct feedback to adolescents aimed at

49 increasing motivation to both prevent and reduce risk behaviors and 2) summarize youth-  
50 reported risk behaviors, goals, and consequences for Primary Care Providers (PCPs) in order  
51 to stimulate patient-provider discussions around risk reduction. After completing a brief (15  
52 minute) health survey, adolescents receive electronic feedback which includes normative  
53 information, messages consistent with motivational interviewing (i.e., awareness and  
54 consequences, discrepancies), and goal setting strategies. PCPs can also receive specific  
55 information on patient responses that allow them to reinforce healthy behavior choices and  
56 implement further brief in-person interventions for moderate to high-risk adolescents. Thus,  
57 Check Yourself will provide a streamlined report with decision support for PCPs regarding  
58 recommended next steps in care based on evidence-based guidelines, and information  
59 regarding youth-reported risks, consequences, and goals in order to foster conversations that  
60 support motivation to change. In this study, we will evaluate the perceived impact and  
61 efficacy of Check Yourself among a sample a sample of adolescents aged 13-18 years drawn  
62 from the targeted primary care clinics using a groups who receives usual care as a  
63 comparison.

64  
65 II. Criteria for Subject Selection

66  
67 a. **Sample Size**

68 We will enroll approximately 300 adolescent (age 13-18)-parent dyads who have an  
69 appointment with a provider at one of five participating clinics,(see appendix 1) .

70  
71 b. **Gender of Subjects**

72 This study does not have any gender-based restrictions. However, given that mothers are  
73 more frequently primary caregivers, we estimate the following gender distribution in our  
74 study population:

75  
76 Adolescents: 150 Females and 150 Males  
77 Parents: 240 Mothers and 60 Fathers

78  
79 c. **Age of Subjects (rationale if restrictions)**

80 Participants will include adult *parents* (over the age of 18 years) and *adolescents* (age 13-18).  
81 As health risk behaviors typically begin in adolescence and persist into adulthood, we are  
82 targeting adolescents rather than children less than 13 years of age.

83  
84 d. **Racial and Ethnic Distribution**

85 We will recruit an adolescent and caregiver sample that is approximately 75% non-Hispanic  
86 White, 5% African, 7% Asian, 9% Hispanic and 4% other racial groups. Participants will be  
87 drawn from five participating clinics (Appendix 1). The geographic area situating our study  
88 population consists of the following approximate ethnic and racial breakdown: 71% White,  
89 5% African American, 11% Asian, 1% Native Hawaiian/Pacific Islander, 1% American  
90 Indian or Alaska Native, and 11% multiracial; 9% of individuals are of Hispanic ethnic  
91 background.

92  
93 e. **Inclusion Criteria**

94 *Eligible parents* will have a child 13 to 18 years old who has an appointment to see a provider  
95 at a participating clinic, and will be able to understand English or Spanish.

96  
97 *Eligible adolescents* will be 13 to 18 years old, have an appointment to see a provider at a  
98 participating clinic, and will be able to understand English.

99

100 **f. Exclusion Criteria**

101 *Parents* will be excluded from the study if they do not speak English or Spanish; or if their  
102 child is ineligible for participation for the reasons given below.  
103

104 *Adolescents* will be excluded from the study if they do not meet age requirements, have dis-  
105 enrolled or cancelled their appointment with the participating clinic, lack the means to  
106 complete follow-up interviews (i.e., has neither telephone nor internet access), have a sibling  
107 who has/is being enrolled in the study, and/or are not able to understand English. Our  
108 experience in the Seattle region is that, because of English Language Learning supports,  
109 inability to read or understand English is a barrier for <0.5% of adolescents. Thus, we do not  
110 anticipate that language restrictions will significantly limit the demographic distribution of  
111 our participants.  
112

113 **g. Vulnerable Subjects**

114 This study's focus is on adolescent health care, and adolescents are study participants. We  
115 plan to enroll 300 adolescent subjects age 13-18. Most will be minors. Study activities for  
116 minor adolescents will be no different from study activities for 18-year-old adolescents. The  
117 risk/benefit ratio is the same for all adolescent participants regardless of age. Research staff  
118 will obtain oral consent from 18-year-old participants directly, without contacting a parent.  
119 For younger adolescents, research staff will first obtain oral parental consent before obtaining  
120 oral assent.  
121

122 III. Methods and Procedures

123 **a. Study Design**

124 This study will evaluate the effect of Check Yourself on adolescent-perceived quality of care  
125 and health risk behaviors using a parallel, two-arm randomized-controlled study design. The  
126 study will take place at five clinics (see Addendum).  
127

128 We anticipate that approximately 60% of youth approached will participate in the study and  
129 will therefore invite approximately 500 adolescent/parent dyads to participate in the Check  
130 Yourself app to yield 300 adolescent/parent dyad participants in our total sample. Upon  
131 enrollment, parent participants will be asked to complete a brief, 10-minute questionnaire  
132 web-based about their education/occupation, their adolescent's health history, and potential  
133 concerns about their adolescent's health risk behaviors. Adolescents who enroll in the study  
134 will be randomized to receive either the Check Yourself intervention or usual care (UC).  
135 Randomization will be carried out by the Study Data Manager under the guidance of the  
136 statistician, with randomization stratified by age (13-15 or 16-18), gender within each clinic  
137 to assure an even distribution of these variables. The randomization sequences will be placed  
138 into 4 stratum specific blocks in Datstat, a data collection platform for healthcare research  
139 which will be used by research assistants to determine whether adolescents receive Check  
140 Yourself or Usual Care following the consent process.

141 Following randomization, at baseline (T1), adolescents will be asked to complete a screening  
142 survey online or via a tablet including questions about guideline-recommended health risk  
143 behavior screening areas including substance use, nutrition, physical activity, sexual  
144 behavior, depressive symptoms, and safety. The content of the screener questions are current  
145 standard of care as recommended screening practices.

146 Adolescents who are assigned to the Check Yourself intervention will receive personalized  
147 motivational feedback following completion of the screening as part of the same online or

148 tablet session. Their PCPs will receive a provider report including specific information on  
149 the adolescent's responses that will allow them to reinforce healthy behavior choices and  
150 implement further brief in-person interventions for moderate to high risk adolescents.  
151 Providing feedback on screening results to the participant and provider is consistent with  
152 current standard of care. However, the electronic method of delivery is unique to this project.

153 Adolescents randomized to usual care will complete the screening survey for research  
154 purposes, but neither they nor their PCP will receive feedback about their health behaviors.  
155 PCPs will be advised to screen and counsel all patients as they would normally do under  
156 usual care conditions, consistent with the current standard of care.

157 In order to administer follow-up surveys, we will ask adolescents to provide an email address,  
158 cell phone number, or phone number. One day (T2) following their PCP appointment, all  
159 adolescent participants will be asked via email, text message or phone (based on their  
160 preference) to complete a survey about their health self-efficacy, healthcare climate, change  
161 readiness, and experiences and satisfaction with treatment during the appointment with their  
162 PCP. Three months (T3) following their PCP appointment, adolescent participants will be  
163 asked via email, text message or phone to complete assessment of the same risk behaviors  
164 evaluated at T1 including questions about peer norms of alcohol and marijuana use. These  
165 surveys are not standard of care because they are not collected as part of an appointment,  
166 however, the probability and magnitude of discomfort associated with the completion of these  
167 surveys is no greater than ordinarily encountered in daily life or during the performance of  
168 routine psychological examinations/tests or medical care. While they are collected solely for  
169 research outcome assessment, the assessment includes similar content to the initial screening.

## 170 **b. Data Analysis and Data Monitoring**

### 171 **Data Analysis**

172 Data from the web-based surveys will be uploaded in to Stata analytic software. Prior to  
173 analysis, all variables will be checked for validity, missingness, and distributional  
174 assumptions. Preliminary analyses required for variable construction, any required imputation  
175 of missing data, assessment of psychometric properties of scale scores, and assessment of the  
176 validity of study variables will be completed before analyses evaluating intervention effects.  
177

178 We will employ intent-to-treat techniques for all analyses associated with the Check Yourself  
179 intervention. Prior to conducting regression analyses, we will evaluate the effectiveness of  
180 randomization by comparing the differences in demographics, parent measures, and health  
181 risk behaviors at baseline between Check Yourself and usual care using t-tests (continuous  
182 variables) or chi-squared tests (categorical variables). The relatively large sample size (150  
183 per condition) and the use of stratified randomization will increase the likelihood that groups  
184 will be balanced at baseline. However, in the case that any of the above variables are  
185 unbalanced between randomization arms, we will include the unbalanced variable as a  
186 covariate in all regression analyses.

187 For our primary analysis, the outcome will be a summary health risk variable constructed  
188 from weighted key risk behaviors (as shown in the table below). The score will be weighted  
189 based on tool-defined risk levels: high-risk behaviors will be assigned a score of 2, and  
190 moderate-risk a score of 1. Participants who do not meet the criteria for moderate or high risk  
191 will be considered low risk for that behavior and given a risk score of 0. A total risk score  
192 will be calculated for each youth by summing all individual risk scores. Linear mixed  
193 regression models will be used to compare differences in youth-reported total risk score at 3

194 months in intervention versus control youth controlling for baseline total risk score, age at  
 195 baseline, gender and the clustering by clinic.

196 As part of the primary outcome, we will also examine receipt of counseling, measured 1-day  
 197 post well visit. Receipt of counseling will be defined as youth-reported receipt of provider  
 198 counseling to change a behavior towards health. The total number of endorsed moderate and  
 199 high risk behaviors for which the youth reported receiving counseling will be treated as count  
 200 outcome, and compared using Poisson regression models between intervention and control  
 201 youth. To ensure that the coefficient of group indicator captures the differences in rates of  
 202 *targeted* counseling between arms, the overall number of moderate and high risk behaviors  
 203 endorsed by youth will be included as an offset variable in the Poisson models.

204 To examine the differential effects of the intervention on reducing high versus moderate risk  
 205 behaviors, secondary analyses will be conducted examining the association between  
 206 intervention status and rates of counseling for each of these categories of behavior. Secondary  
 207 analyses will also include linear and logistic mixed regression methods to assess differential  
 208 changes in individual risk behaviors between intervention and control arms. All regression  
 209 analyses will control for age at baseline and gender consistent with the stratified  
 210 randomization. A clinic-specific random effect will be included in all regression models to  
 211 account for clustering within clinics.

212 Table 1:

213 **Primary Outcome Measures** – Our primary outcome measures include a summary variable  
 214 of health risk behaviors measured at 3 months post visit and the rate of receipt of counseling  
 215 for endorsed behaviors during the well visit. The risk summary measure includes behaviors  
 216 in the Check Yourself tool (last column of Table) weighted based on tool-defined risk levels  
 217 (low-risk, medium-risk, and high-risk).  
 218

219 **Secondary Outcome Measures** – We will assess differential effects of the tool on high  
 220 versus moderate risk behaviors using separate Poisson regression analyses to examine the  
 221 total number of behaviors meeting each of these categories. To examine if there are stronger  
 222 effects of the intervention on specific health risk behaviors, we will conduct exploratory  
 223 logistic regression analyses for each of the assessed behaviors.  
 224  
 225

| Health Domain                                  | Low Risk=0 | Moderate Risk=1 | High Risk=2 |
|------------------------------------------------|------------|-----------------|-------------|
| <b>Eating/Nutrition</b>                        |            |                 |             |
| Sweetened beverage consumption (drinks/day)    | 0-1        | 2+              |             |
| Fruit and vegetable consumption (servings/day) | 4+         | 0-3             |             |
| <b>Activity</b>                                |            |                 |             |
| Days physical activity (>60 min)               | 4+         | 0-3             |             |

|                        |     |     |  |
|------------------------|-----|-----|--|
| Screen time (hrs./day) | 0-2 | 3+  |  |
| Sleep (hrs./night)     | 8+  | 0-7 |  |

**Tobacco Use**

|             |      |     |  |
|-------------|------|-----|--|
| Tobacco Use | None | Any |  |
|-------------|------|-----|--|

**Safety**

|                      |        |  |            |
|----------------------|--------|--|------------|
| Seatbelt use         | Always |  | Not Always |
| Bike helmet use      | Always |  | Not Always |
| Drives drunk or high | No     |  | Yes        |

**Alcohol\***

|              |                                                                                                                                                                                                                                                                                                                             |                                                                                                                                                                                      |                                                                                                                                                                                                                                                                                                                        |
|--------------|-----------------------------------------------------------------------------------------------------------------------------------------------------------------------------------------------------------------------------------------------------------------------------------------------------------------------------|--------------------------------------------------------------------------------------------------------------------------------------------------------------------------------------|------------------------------------------------------------------------------------------------------------------------------------------------------------------------------------------------------------------------------------------------------------------------------------------------------------------------|
| Alcohol Risk | <p><b>Low risk for frequency (Age 13-15: 0 days/mo; Age 16-17: 0-1 days/mo, Age 18: 0-2 days/mo)</b></p> <p>AND</p> <p><b>Low risk for quantity (by gender)</b></p> <p><b>(Boys: Age 13: 0-2 drinks; Age 14-15: 0-3 drinks; Age 16-18: 0-4 drinks)</b></p> <p><b>(Girls: Age 13-17: 0-2 drinks; Age 18: 0-3 drinks)</b></p> | <p><b>Moderate risk for frequency (Age 13-15: no moderate use; Age 16-17: 2 days/mo; Age 18: 3 days/mo)</b></p> <p>AND</p> <p><b>Low risk for quantity (see Low risk column)</b></p> | <p><b>High risk for frequency (Age 13-15: 1+ days/mo; Age 16-17: 3+ days/mo; Age 18: 4+ days/mo)</b></p> <p>OR</p> <p><b>High risk for quantity (by gender)</b></p> <p><b>(Boys: Age 13: 3+ drinks; Age 14-15: 4+ drinks; Age 16-18: 5+ drinks)</b></p> <p><b>(Girls: Age 13-17: 3+ drinks; Age 18: 4+ drinks)</b></p> |
|--------------|-----------------------------------------------------------------------------------------------------------------------------------------------------------------------------------------------------------------------------------------------------------------------------------------------------------------------------|--------------------------------------------------------------------------------------------------------------------------------------------------------------------------------------|------------------------------------------------------------------------------------------------------------------------------------------------------------------------------------------------------------------------------------------------------------------------------------------------------------------------|

**Marijuana or other drug use\***

|                                   |        |         |     |
|-----------------------------------|--------|---------|-----|
| Marijuana frequency (days /month) | 0 days | 1+ days |     |
| Other drug use                    | None   |         | Any |

226

**Sex\***

|                       |                                     |  |                                             |
|-----------------------|-------------------------------------|--|---------------------------------------------|
| Risky sexual behavior | Any birth control at last sex       |  | No birth control at last sex                |
|                       | AND                                 |  | OR                                          |
|                       | Always uses condoms/barrier methods |  | Does not always use condoms/barrier methods |

**Emotions**

|             |     |  |     |
|-------------|-----|--|-----|
| PHQ-9 score | 0-9 |  | 10+ |
|-------------|-----|--|-----|

227

228

229

230

231

\*In cases where multiple indicators were used to define risk behavior (alcohol, marijuana, sex), a subject is considered at high risk if ANY indicator was endorsed at high risk, a subject is considered at low risk if ALL indicators were endorsed as low risk. Subjects are considered moderate risk if they have at least one moderate risk indicator and no high risk indicators.

232

**Data Monitoring**

234

The proposed research involves no greater than minimal risk to participants.

235

236

237

238

239

240

241

242

243

Adverse Events. Project staff will be trained to identify potential adverse events and instructed to report them immediately to the principal investigators. Should any study participant or caregiver express concerns about the study or their participation or appear distressed during any study activities, the witnessing research team member will bring the matter to the attention of the principal investigators who will distinguish serious adverse events from non-serious adverse events. Serious adverse events will be documented and discussed with the IRB as soon as possible, and reported to the IRB within 48 hours. An annual report will be submitted to HRSA and the IRB summarizing all adverse events.

244

245

246

247

248

249

250

251

Data Quality Assurance and Confidentiality. Data quality assurance will be monitored on an ongoing basis by a designated study team member. She will each conduct routine protocol compliance checks to ensure that safety procedures, such as ensuring participant confidentiality and maintaining approved standards for data transport, are strictly adhered to at each site. All study data will be stored in password-protected computer files and identified with study IDs. Analytic data files will contain no identifying information. Other confidentiality issues are discussed in the prior section “Protection Against Risks.”

252

253

254

255

256

257

HIPAA Compliance. All participants will be recruited from clinical sites, and as such their participation is subject to the Health Insurance Portability and Accountability Act of 1996 (HIPAA) privacy and security standards. All relevant staff has completed required HIPAA training and all research activities will be conducted in compliance with HIPAA standards. All study data will be securely stored and labeled as discussed on the “Data storage and confidentiality” section of this protocol, below. PCPs of participants assigned to the Check

258 Yourself intervention will receive feedback including specific information on the  
259 adolescent's responses that will allow them to reinforce healthy behavior choices and  
260 implement further brief in-person interventions for moderate to high-risk adolescents.  
261 Although a participant's responses to the health screener constitute protected health  
262 information generated from the research study, since the results are shared with the  
263 participant's PCP for treatment and/or health-monitoring purposes, this disclosure falls within  
264 an exception of the minimally necessary requirement of the Privacy Rule (Section 164.502).

### 265 c. Data storage and confidentiality

266 One month prior the adolescent's scheduled appointment with their PCP, participating clinics  
267 will generate reports with potential participants' contact information from via electronic  
268 scheduling tools which will be provided to study staff. We will collect the minimum amount  
269 of information necessary to identify potentially eligible participants from the participating  
270 clinics' electronic scheduling tools. We have obtained a full waiver of authorization under  
271 HIPAA to request a waiver of documentation of consent/assent and waiver of the requirement  
272 of a signature on the waiver for use and disclosure of Protected Health Information. We have  
273 previously received a partial HIPAA waiver to obtain contact information for individuals who  
274 have scheduled an appointment at the participating clinics. Data used include:  
275 parent/guardian name, adolescent name, address, and telephone number. Parents/guardians  
276 will be contacted and will be invited to participate in the study and provide consent for their  
277 child to participate and their child's name and contact information. If the adolescent is over  
278 18, we will contact them directly and invite them to participate in the study and provide their  
279 consent and their parent/guardian's name, address, and telephone number. Contact and  
280 identifying information will be for study recruitment purposes will only be accessible to study  
281 staff with a direct need to access this information (e.g., research staff mailing letters and  
282 conducting phone screening). We will assign a unique study number to individuals for  
283 recruitment purposes. This study number is then used in study files, rather than subjects'  
284 names. We will then maintain and protect a linking file, which links study number to  
285 participants' names and other identifying information including participants' e-mail addresses  
286 and cell phone numbers which will be collected. This linking file will be stored in Seattle  
287 Children's Research Institute (SCRI) on a secure database on the SCRI network. Access to  
288 the SCRI network is controlled by valid, networked user accounts which include study  
289 researchers and staff. Identifying information used to recruit participants will be destroyed  
290 within 6 years of the end of the study.

291  
292 SCRI is responsible for storage of data collected from participants. Study data for enrolled  
293 participants will be identified by study IDs and will also be retained in a SCRI secure  
294 database on the SCRI network. Analytic data files will contain no identifying information.  
295 Paper-based data will be stored in locked file cabinets, with all identifying information  
296 removed.

297  
298 Subject demographic data will be recorded in a password-protected database. Completed  
299 questionnaire data will be collected through DatStat Illume, a platform used to develop  
300 secure, web-based surveys, and then exported from DatStat Illume into SPSS, Stata/SE, and  
301 SAS for analysis purposes. Data are stored on a secure SQL server, and are available to study  
302 investigators for queries, reports, and download for analysis.

303 Web-based surveys will be accessed by logging on to a secure server with security and data  
304 integrity violations obviated by requiring participants to log in with a password unrelated to  
305 any identifying information on any on-line page or database. All information transferred



306 between client and server machines will be secured using 128-bit encrypted Secure Sockets  
 307 Layer. All data stored in the online repository will be encrypted using the official Advanced  
 308 Encryption Standard algorithm. Protocols have been informed by prior internet-based studies  
 309 conducted by study investigators.

310 For participants randomized to the intervention, their Check Yourself baseline feedback  
 311 report will be printed by study or participating clinic staff and given to the participant’s PCP  
 312 prior to their appointment. Participant Check Yourself reports will be shared with  
 313 participating clinic staff via a protected, designated fax machine available only to clinic staff  
 314 and providers or through a secure server with security and data integrity violations obviated  
 315 by requiring them to log in with a password unrelated to any identifying information related  
 316 to the research participant. All information transferred between client and server machines  
 317 will be secured using 128-bit encrypted Secure Sockets Layer. All data stored in the online  
 318 repository will be encrypted using the official Advanced Encryption Standard algorithm.  
 319 Protocols have been informed by prior internet-based studies conducted by study  
 320 investigators.  
 321

322 For purposes of analysis and manuscript preparation, any paper data files will be maintained  
 323 for up to 3 years after the project ends, after which all paper data will be disposed of via  
 324 shredding. Secure, electronic data files will be kept for up to 6 years after the project ends on  
 325 SCRI’s secure network.  
 326

327 **c. Measures by Construct and Method**

328 Below are the measures used in the study, organized by construct and method.

| <b>Measures and Constructs</b>                                                                                                                                                     | <b>Method</b> |
|------------------------------------------------------------------------------------------------------------------------------------------------------------------------------------|---------------|
| <b>Demographics</b>                                                                                                                                                                |               |
| Gender, age, race, household makeup, school, truancy, support, goals                                                                                                               | T1            |
| <b>Parent Concerns</b>                                                                                                                                                             |               |
| Guidelines for Adolescent Preventative Services Parent Questionnaire: adolescent health risk behavior concerns.                                                                    | PQ            |
| <b>Quality of Care</b>                                                                                                                                                             |               |
| Adolescent Report of the Visit: adolescent-report of the PCPs’ delivery of risk behavior screening and counseling based on risk level.                                             | T2            |
| Client Satisfaction Questionnaire: adolescent self-report of general satisfaction with care, service quality, and the extent to which the visit met needs and intention to return. | T2            |
| Health Care Climate Questionnaire: adolescent self-report of how adolescents feel about visits to their primary care giver.                                                        | T2            |
| Interval Receipt of Care: adolescent self-report of extent of follow up care.                                                                                                      | T3            |
| <b>Behavior Change Variables</b>                                                                                                                                                   |               |
| Health Self-Efficacy Scale: self-report of perceptions of confidence to initiate behaviors that achieve goals.                                                                     | T2            |
| Readiness to Change Rulers: Self-report used to assess adolescent motivation for change among specific behaviors.                                                                  | T2, T3        |
| Peer Use Norms Alcohol and Marijuana: Adolescent’s estimate peer alcohol and marijuana use                                                                                         | T3            |

| <b>Health Behavior Variables</b>                                                                                                                                                                                               |        |
|--------------------------------------------------------------------------------------------------------------------------------------------------------------------------------------------------------------------------------|--------|
| Alcohol Consumption, Tobacco Use, and Marijuana Use: self-report based on items about typical quantity and frequency of drinking, smoking/using tobacco, and marijuana use (each calculated separately) over the past 30 days. | T1, T3 |
| Fruit and Vegetable Screener: self-report of fruit and vegetable consumption.                                                                                                                                                  | T1, T3 |
| Physical Activity Screener: self-report of physical activity.                                                                                                                                                                  | T1, T3 |
| Sexual Risk: self-report of sexual activity, birth control, and condom use.                                                                                                                                                    | T1, T3 |
| Patient Health Questionnaire-9 (PHQ-9): self-report of DSM-V symptoms for depression.                                                                                                                                          | T1, T3 |
| Safety: self-report to assess behaviors that contribute to unintentional injuries (e.g., seat belt use, helmet use).                                                                                                           | T1, T3 |

Key: PQ=Parent Questionnaire

T1=Adolescent Questionnaire at Time point 1 (Baseline)

T2=Adolescent Questionnaire at Time point 2 (1-day)

T3=Adolescent Questionnaire at Time point 3 (3-month)

IV. Risk/Benefit Assessment

**a. Risk Category**

This is a minimal risk study, with the probability and magnitude of discomfort no greater than ordinarily encountered in daily life or during the performance of routine psychological examinations/tests or medical care. We have received a Full Waiver of Authorization under HIPAA for waiver of documentation of consent and waiver of the requirement for signature on the authorization for use and disclosure of health information.

**b. Potential Risks and Protection Against Them**

**RISKS:** We foresee three potential risks to study participation. The first risk to participants is that the information provided on the questionnaires may not remain confidential, based on the fact that study instruments contain personal information about health related behaviors (i.e., alcohol use, depression). The PCP may choose to put risk behavior information in the adolescent participant’s electronic medical record. It is also possible that adolescents may leave their computer screen with information from the online surveys open in their web-browser and someone else might see it. Although we will emphasize the importance of completing the survey in a private setting, adolescent participants may still complete it in an open setting (i.e., computer in the family room) and other family members might observe their responses.

The second risk is that we may discover suicidality, prompting the study researchers and staff to potentially breach confidentiality by notifying parents/guardians and care providers. Adolescents with concerns for suicidal ideation will be asked if in the past 3 months they have had serious thoughts about ending their life and if they have ever made a suicide attempt. Further management is described in the Protection against Risk section below.

The third risk is that email addresses of participants sent from SCRI could become public. To minimize this risk, Seattle Children's Hospital, the institution through which this research takes place, uses Accellion, which is FIPS 140-2 compliant, to send secure emails.

362 **Protections against Risks:** Participants will be fully informed of the potential risks of  
363 participation, alternate treatment options, and their right to discontinue study participation at  
364 any time. Specific steps we will take to reduce known risks are specified below:  
365

366 1. *Confidentiality and Protections:* As part of the baseline and follow-up surveys (T1, T2  
367 and T3) procedures, adolescents and caregivers will be informed that the adolescent  
368 should complete the assessment privately and adolescents will be instructed to exit the  
369 web browser at the completion of the survey. For participants randomized to the  
370 intervention, Check Yourself feedback at baseline will be shared with treating PCPs  
371 (described in study information sheet), but data collected during all follow-up  
372 assessments will be held confidential and will not be shared. The study information sheet  
373 will clarify the nature of data collected and whether data will be shared with treating  
374 PCPs. The study information sheet will also outline situations in which results may need  
375 to be shared with caregivers (i.e. suicidal thoughts). All materials included in the chart by  
376 PCPs will be considered part of confidential patient data and will be bound by customary  
377 restrictions on access to patient records. For example, Washington State law requires  
378 consent of the youth to release information regarding their mental health, sexual health,  
379 and alcohol and drug use. In the clinical sites for this study, it is standard practice for  
380 clinicians to review adolescent records before they are released to the parents. It should  
381 be noted that screening of health risks including depression, sexual activity, and alcohol  
382 use is a routine and recommended aspect of adolescent clinical care. All study data will  
383 be securely stored in either password-protected computer files or in locked file cabinets  
384 and identified with study IDs (see section III.c. for specific data security measures).  
385

386 2. *Management of suicidality.* Regardless of intervention status, participants with a positive  
387 response on the items assessing suicidality will be flagged for further evaluation during  
388 their appointment with the PCP. Research staff will track all flagged youth to ensure that  
389 an assessment is completed by one of the study clinicians. A study clinician will call to  
390 evaluate any youth with a positive response on items assessing suicidality using a  
391 protocol that we have employed in our prior depression studies and will assist in  
392 connecting the youth with care based on level of assessed risk. The assessment consists  
393 of a semi-structured interview (including questions about pervasiveness of thoughts,  
394 impulsivity, presence of a plan and current supports) with guidance for assessing risk.  
395 All youth judged to be at higher than minimal risk will be encouraged to seek care and  
396 assisted with identifying an appropriate resource (PCP, mental health specialty care,  
397 emergency services) based on severity. Youth who are found to be actively suicidal will  
398 be assisted with receiving resources within 24 hours. Youth who are at low risk will be  
399 assisted with connecting with the PCP within 1-2 weeks. For youth <18 years old who  
400 are found to be at higher than minimal risk, the investigator will also speak with a  
401 parent/guardian to share recommendations and offer assistance in accessing care. Consent  
402 procedures will make clear the situations in which a caregiver would be notified using  
403 standard clinical language regarding danger to self or others. Arrangements will also be  
404 made to follow up with parents or young adult (e.g., 18-year old) participants to ensure  
405 that they do not need further assistance in arranging care. This protocol has functioned  
406 smoothly in each of our prior studies and overall youth and parents have been grateful for  
407 the information provided and additional assistance in receiving care.  
408

409 **c. Potential Benefits**

410 *Individual Benefit (other than remuneration):* All participants may receive some satisfaction  
411 or indirect benefit from contributing to this research. Intervention youth will receive  
412 personalized feedback aimed at increasing their self-efficacy and motivation to reduce health

413 risk behaviors. PCPs will also receive multi-risk behavior screening results for these youth,  
414 and will be encouraged to discuss these results with youth during the visit.

415  
416 *Societal Benefit:* Potentially preventable health-compromising behaviors are among the  
417 leading causes of morbidity and mortality in the adolescent age group. Screening and  
418 preventive interventions are recommended by multiple professional organizations, but are  
419 often not performed. The current study takes an innovative strategy of personalized feedback  
420 for adolescents and their PCPs in order to increase the delivery of risk reduction counseling  
421 and improve adolescent health outcomes. This project will be an important contribution  
422 towards in testing a strategy that can be broadly disseminated to reduce health compromising  
423 behaviors in primary care settings. It will enhance scientific knowledge, increase technical  
424 capacity for prevention/intervention (through Check Yourself) and is designed to improve  
425 clinical practice. Society will benefit from the testing of a youth-friendly personalized  
426 feedback tool that is prepared for use in healthcare settings. In this regard, the minor risks  
427 incurred are outweighed by the anticipated benefits.

428  
429 **d. Alternatives to Participation**

430 Participation is voluntary and discontinuation is an option at any time during the study.

431  
432 V. Recruitment and Consent

433  
434 **a. Recruitment Method**

435 Staff from Seattle Children’s Research Institute (SCRI) will recruit and enroll participants  
436 through a rolling recruitment process, organized by clinic.

437  
438 Potential participants will be identified two to six weeks before their scheduled appointment  
439 via a data pull from the clinic scheduling software. Research staff will mail an Introductory  
440 Packet to the youth’s home containing:

- 441 • Introductory letter signed by the clinic with an opt-out phone number
- 442 • Introductory flyer
- 443 • Study Information sheet

444 These documents are attached to this application.

445  
446 We have received a partial waiver of authorization under HIPAA to obtain contact  
447 information for potential participants. Our procedure will be:

- 448 1. Contact the parent by phone (please see attached Phone Script).
- 449 2. Screen for eligibility, explain the study, and answer questions. If the parent wishes to  
450 participate, study staff will arrange a meeting with the parent and adolescent via telephone to  
451 review the study information sheet and obtain oral consent/assent.

452  
453 “Adult adolescent” (i.e. 18 year old) recruitment: “Adult adolescents” will be approached  
454 before their parent. Study staff will attempt to contact the “adult adolescent” by phone. Once  
455 the “adult adolescent” is contacted, study staff will explain the study, give detailed  
456 information, and answer questions. If the “adult adolescent” wishes to participate, staff will  
457 arrange a meeting with the adult adolescent via telephone to obtain oral consent. Then the  
458 parent will be approached.

459  
460 **b. Waiver of Documentation of Consent/Assent and Waiver of Authorization**

461 We are requesting a waiver of documentation of consent/assent and waiver of Authorization.  
462 This research study poses no more than minimal risk to research participants. The questions  
463

464 asked in the online baseline screening survey are based on standard screening questions,  
465 typically administered during routine health care visits and considered standard of care.  
466 What differs from standard of care is the electronic administration of the screening questions  
467 and the personalized electronic feedback. We are requesting this waiver because, whenever  
468 possible, we intend to deliver the online screening survey and follow-up visits via the  
469 internet, rather than in-person. Thus, it would not be practicable to obtain written parental  
470 consent and assent if study visits are completed online.

471  
472 *Parent oral consent and permission and oral assent.*

473  
474 1. Oral parent consent and permission will be obtained over the telephone, prior to the  
475 youth's appointment at a mutually agreed upon time. The study information sheet will  
476 include the required elements of authorization under HIPAA.

477  
478 *Minor adolescent oral assent.* Study staff will reach the minor adolescent by phone to explain the study.  
479 Assent will be obtained in conjunction with the oral parental consent and permission..

480  
481 "Adult adolescent" oral consent will be obtained via telephone . "Adult adolescents" may  
482 participate in the study even if their parent does not participate.

483  
484 **c. Subject Capability**

485 All potential subjects will have the capacity to give consent.

486  
487 **d. Subject Comprehension**

488 Interested *parents* will have the opportunity to discuss the study with SCRI staff prior to  
489 enrollment. Throughout this conversation, SCRI staff will assess parental understanding of  
490 the project and of participation expectations by asking parents to use their own words to  
491 describe the project and their role in it. Efforts to clarify and simplify the research and  
492 parents' role will be prioritized. Additionally, staff will provide reminders that parents retain  
493 the right to withdraw from the study at any time. SCRI staff will invite questions from the  
494 parents, reiterate their right to refuse participation, and ask whether they are comfortable with  
495 participation.

496  
497 Interested *adolescents* will also have the opportunity to discuss the study with SCRI staff  
498 prior to enrollment. Throughout this second conversation, SCRI staff will assess teens'  
499 understanding of the project and of participation expectations by asking them to describe the  
500 project in their own words. Staff will remind youth that they can withdraw from the study at  
501 any time without adverse consequences. SCRI staff will encourage questions, reiterate the  
502 right to refuse participation, and ask whether they are interested in participating.

503  
504 **e. Consent Forms**

505 Consent forms for parents and adolescents are included in this submission bundle.

506  
507 **f. Documentation of Consent**

508 *Parents* may consent orally and adolescents may provide oral assent. Documentation of oral  
509 consent and assent will be noted by research staff and kept in study files.

510  
511 **g. Costs to Subject**

512 There are no study-related costs for any participants.

513  
514 **h. Payment for participation**

515 *Parents/Caregivers* who complete Parent Questionnaire will each be given a \$10 incentive.  
516 *Adolescents* who complete Baseline, 1-day and 3-month Questionnaires will be given a \$20  
517 incentive after each questionnaire (with a possible total of \$60 per child and \$70 per family).  
518

519 **i. HIPAA**

520 SCRI requires that research participants provide authorization to use their protected health  
521 information in connection with research. SCRI's HIPAA form was previously attached to  
522 this submission. We have identified the information that will be collected from participating  
523 clinics and we will be providing protected health information to PCPs of participants assigned  
524 to the Check Yourself intervention including specific information on the adolescent's  
525 responses that will allow them to reinforce healthy behavior choices and implement further  
526 brief in-person interventions for moderate to high risk adolescents. Although a participant's  
527 responses to the health screening survey constitute protected health information generated  
528 from the research study, since the results are shared with the participant's PCP for treatment  
529 and/or health monitoring purposes, this disclosure appears to fall within an exception of the  
530 minimally necessary requirement of the Privacy Rule (Section 164.502). Thus, we are  
531 asking for a waiver of documentation of consent and waiver of the requirement of signature  
532 on the Authorization. As detailed above in the data storage section, all information will be  
533 collected through fully secure sites and all participants are coded to prevent identification of  
534 individuals.  
535  
536  
537  
538  
539  
540  
541  
542  
543  
544  
545  
546  
547  
548  
549  
550
