# Supplementary material for: Effect of Electronic Screening With Personalized Feedback on Adolescent Health Risk Behaviors in a Primary Care Setting: A Randomized Clinical Trial
Source: PubMed Central journal article supplement (PMC6512281; doi:10.1001/jamanetworkopen.2019.3581), 2019-05-10
Supplement: jamanetwopen-2-e193581-s002.pdf [file jamanetwopen-2-e193581-s002.pdf]

## Supplementary Online Content

Richardson LP, Zhou C, Gersh E, Spielvogle H, Taylor JA, McCarty CA. Effect of electronic screening with personalized feedback on adolescent health risk behaviors in a primary care setting: a randomized clinical trial. *JAMA Netw Open*. 2019;2(5):e193581. doi:10.1001/jamanetworkopen.2019.3581

**eTable.** Risk Behaviors Included in Overall Summary Outcome Measure  
**eReferences**

This supplementary material has been provided by the authors to give readers additional information about their work.

| <b>eTable. Risk Behaviors Included in Overall Summary Outcome Measure</b> |                                                                                                |                                                             |                                                                                                        |
|---------------------------------------------------------------------------|------------------------------------------------------------------------------------------------|-------------------------------------------------------------|--------------------------------------------------------------------------------------------------------|
|                                                                           | <b>Low<br/>(0)</b>                                                                             | <b>Moderate<br/>(1)</b>                                     | <b>High<br/>(2)</b>                                                                                    |
| <b>Nutrition</b>                                                          |                                                                                                |                                                             |                                                                                                        |
| Fruits/vegetables per day                                                 | 3+                                                                                             | 0-2                                                         |                                                                                                        |
| Sugared drinks per day                                                    | 0-1                                                                                            | 2+                                                          |                                                                                                        |
| <b>Activity</b>                                                           |                                                                                                |                                                             |                                                                                                        |
| Screen time hrs/day                                                       | 0-2                                                                                            | 3+                                                          |                                                                                                        |
| Sleep hrs/night                                                           | 8+                                                                                             | 0-7                                                         |                                                                                                        |
| Days/week physically active for at least 60 min                           | 4+                                                                                             | 0-3                                                         |                                                                                                        |
| <b>Safety</b>                                                             |                                                                                                |                                                             |                                                                                                        |
| Seat belt use                                                             | Always                                                                                         |                                                             | Any other answer                                                                                       |
| Bike helmet use                                                           | Always                                                                                         |                                                             | Any other answer                                                                                       |
| Drives drunk or high                                                      | No                                                                                             |                                                             | Yes                                                                                                    |
| <b>Alcohol &amp; Drugs</b>                                                |                                                                                                |                                                             |                                                                                                        |
| Alcohol#                                                                  | Low risk for both alcohol frequency and quantity                                               | Moderate risk on alcohol frequency and low risk on quantity | High risk on either alcohol frequency or quantity                                                      |
| Other Substance Use                                                       | None                                                                                           | Marijuana, cigarettes/tobacco                               | Other drugs                                                                                            |
| <b>Sexual Health</b>                                                      |                                                                                                |                                                             |                                                                                                        |
| Risky sexual behavior                                                     | Used birth control at last vaginal sex<br>AND<br>Always uses condom or barrier method with sex |                                                             | No birth control with last vaginal sex.<br>OR<br>Does not always use condom or barrier method with sex |
| Uses barrier method with sex                                              | Always                                                                                         |                                                             | Any other answer                                                                                       |
| <b>Depression</b>                                                         |                                                                                                |                                                             |                                                                                                        |
| Patient Health Questionnaire 9-item (PHQ-9) <sup>1</sup> score            | <10                                                                                            |                                                             | 10+                                                                                                    |

\* High-risk behaviors were defined a priori as those with near term risk of morbidity or mortality  
# Alcohol risk definitions were based on NIAAA guideline age-specific drinking frequency criteria<sup>2</sup> and Donovan age- and gender-specific quantity criteria<sup>3</sup>. (Specific criteria: High risk (13-15 yo) = drinking >0 days/month, >2 drinks/episode (females, 13 yo males) or >3 drinks/episode (males 14-15). High risk (16-17 yo) = drinking >2 days/month, >2 drinks/episode (females), or >4 drinks/episode (males). High risk (18 yo) = drinking >3 days/month, >3 drinks/episode (females), or >4 drinks/episode per episode (males). Moderate risk was based on days/month of drinking only. Youth with meeting high-risk quantity criteria were always categorized as high risk. Since any drinking was considered high risk in 13-

15 year olds, there was no moderate use category. For the other age categories moderate risk was defined as drinking 2 days/month (16-17yo) or 3 days/month (18 yo) based on NIAAA criteria.

### eReferences

1. Kroenke K, Spitzer RL, Williams JB. The PHQ-9: validity of a brief depression severity measure. *J Gen Intern Med.* 2001;16(9):606-613.
2. National Institute of Alcohol Abuse and Alcoholism. Alcohol Screening and Brief Intervention for Youth. A Practitioner's Guide. <https://pubs.niaaa.nih.gov/publications/Practitioner/YouthGuide/YouthGuide.pdf>. Accessed December 10, 2018.
3. Donovan JE. Estimated blood alcohol concentrations for child and adolescent drinking and their implications for screening instruments. *Pediatrics.* 2009;123(6):e975-981.
