# Supplementary material for: Effect of Electronic Screening With Personalized Feedback on Adolescent Health Risk Behaviors in a Primary Care Setting: A Randomized Clinical Trial
Source: PubMed Central journal article supplement (PMC6512281; doi:10.1001/jamanetworkopen.2019.3581), 2019-05-10
Supplement: jamanetwopen-2-e193581-s003.pdf [file jamanetwopen-2-e193581-s003.pdf]

## **Data Sharing Statement**

Richardson. Effect of Electronic Screening With Personalized Feedback on Adolescent Health Risk Behaviors in a Primary Care Setting. *JAMA Netw Open*. Published May 10, 2019.  
10.1001/jamanetworkopen.2019.3581

### **Data**

**Data available:** No
